# Supplementary material for: Was Australia a sink or source of CO 2 in 2015? Data assimilation using OCO-2 satellite measurements
Source: Copernicus journal article supplement (doi:10.5194/acp-2021-16), 2021-01-22
Supplement: Supplementary file 1 [file acp-2021-16-supplement.pdf]

# Supplementary material

## 1 Enhanced vegetation index analysis (EVI)

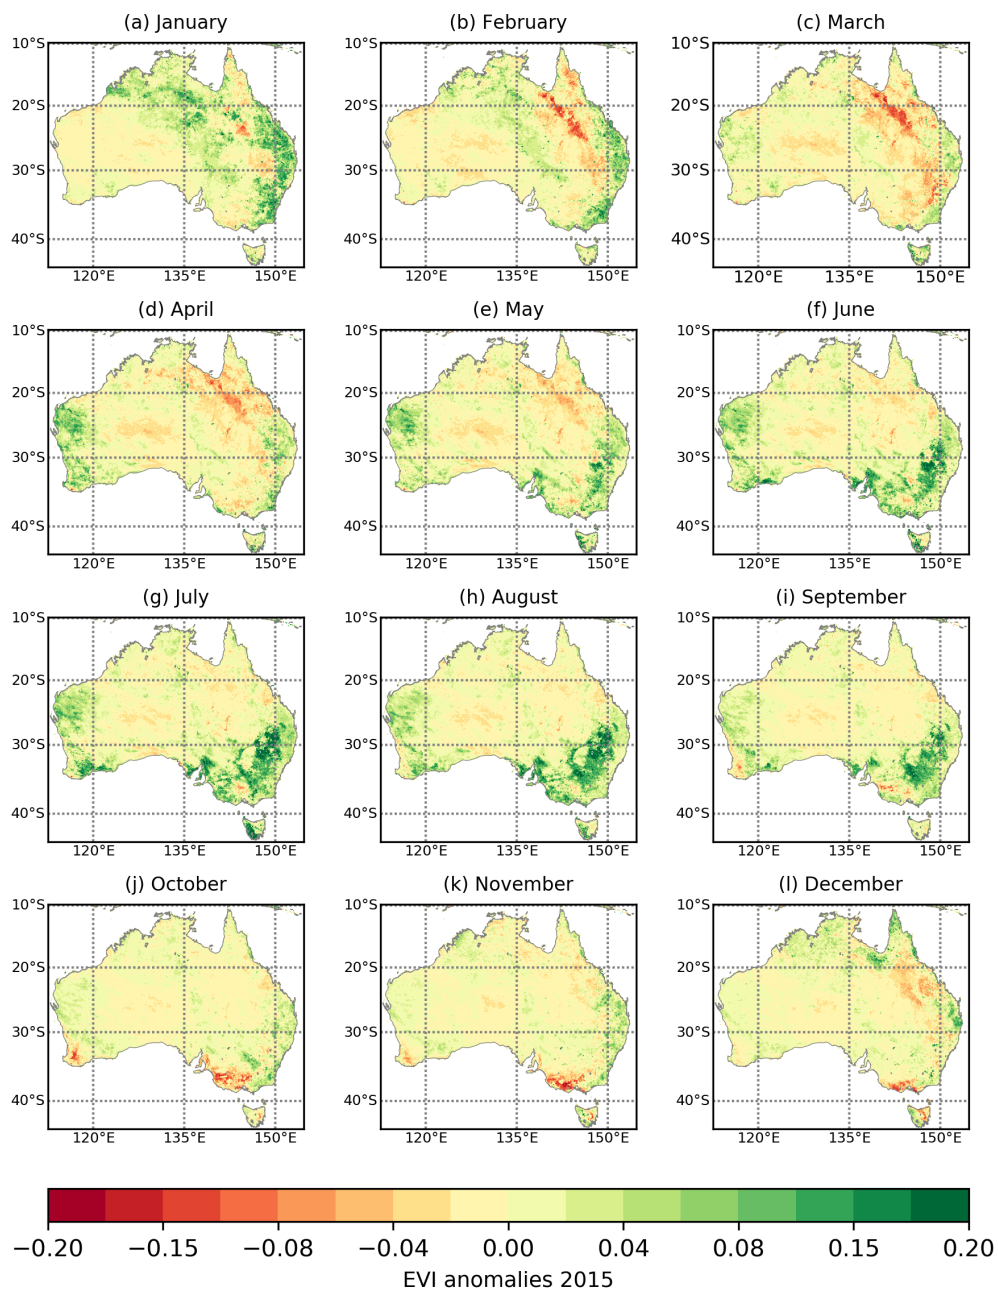

**Figure S1.** Enhanced vegetation index (EVI) anomalies for 2015.

## 2 Rainfall analysis

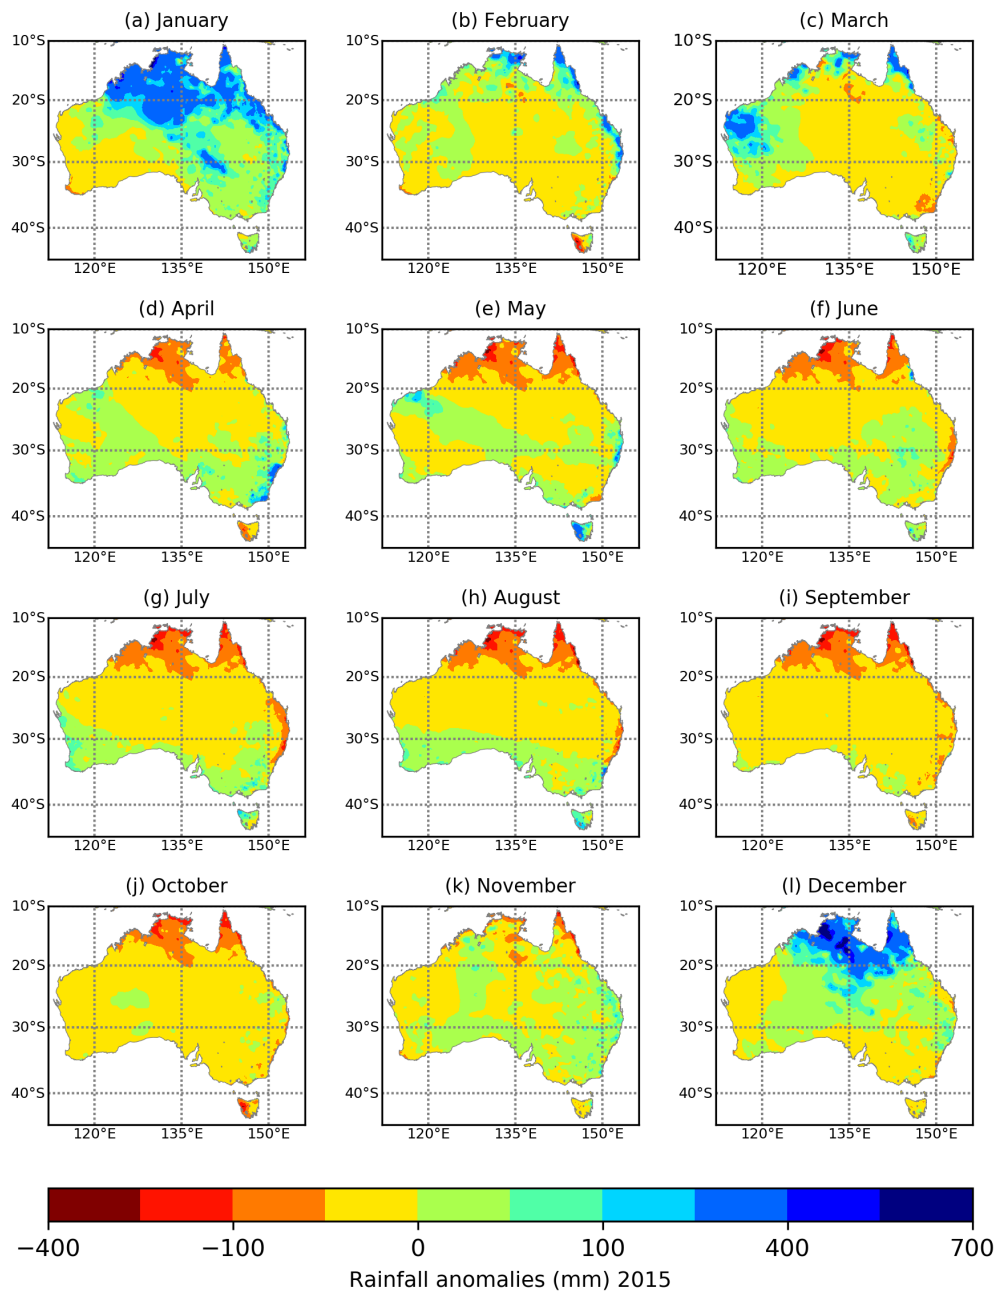

**Figure S2.** Rainfall anomalies (mm) for 2015.

### 3 Wind direction analysis

#### 3.1 Wind directions at TCCON sites

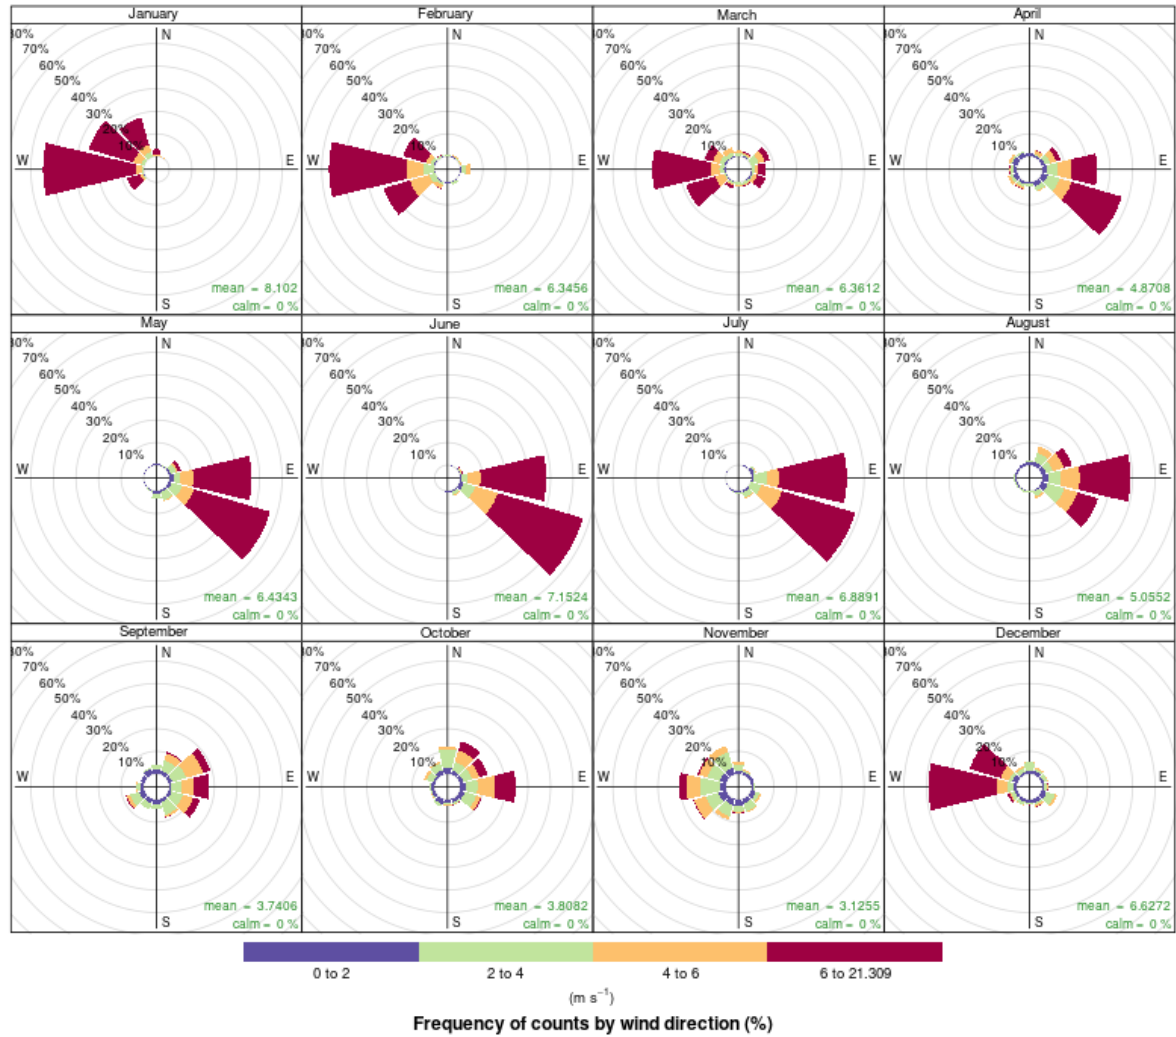

Figure S3. Wind rose TCCON Darwin location for 2015.

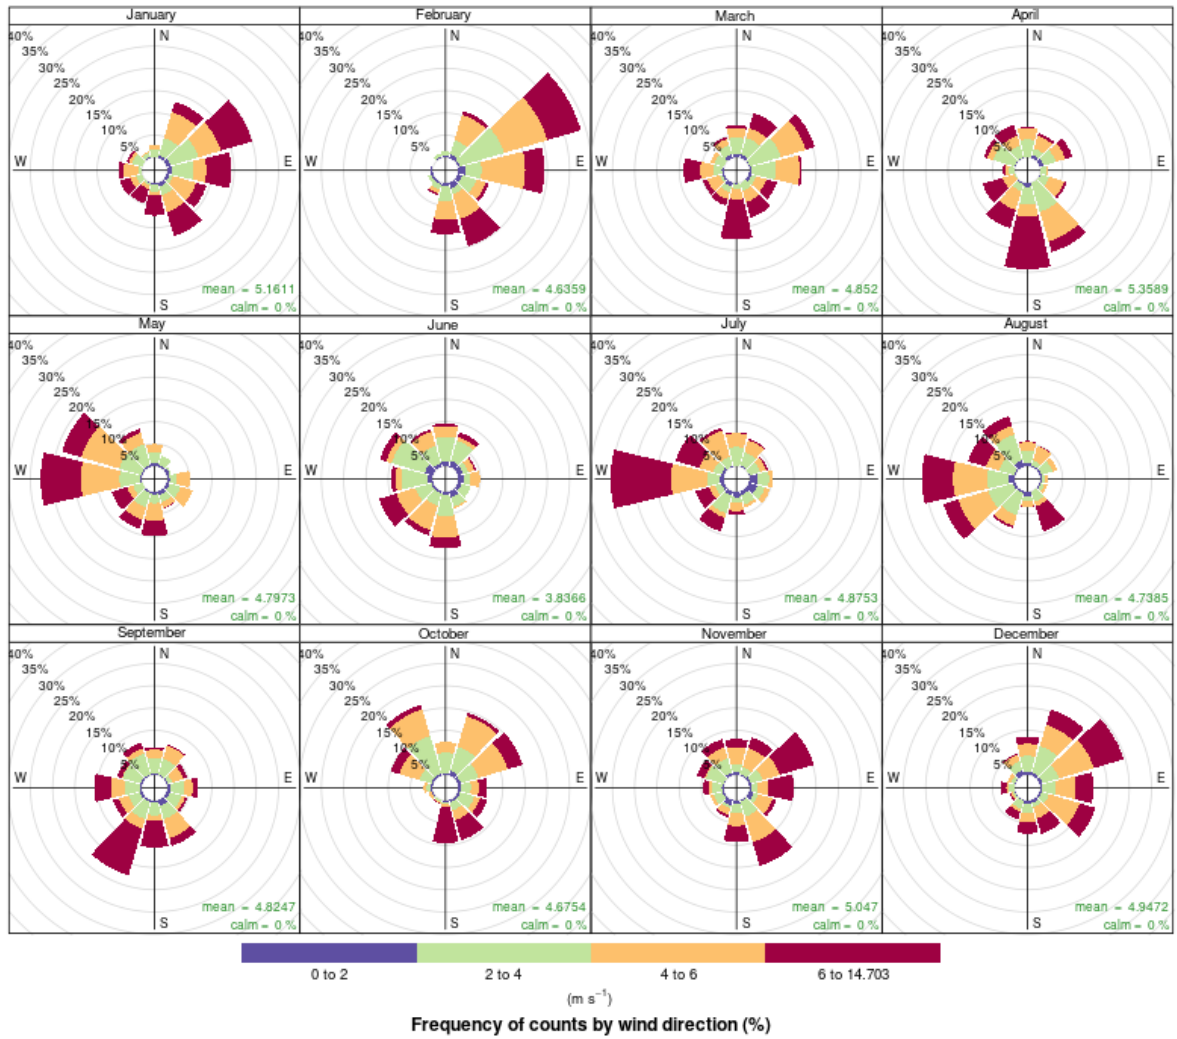

Figure S4. Wind rose TCCON Wollongong location for 2015.

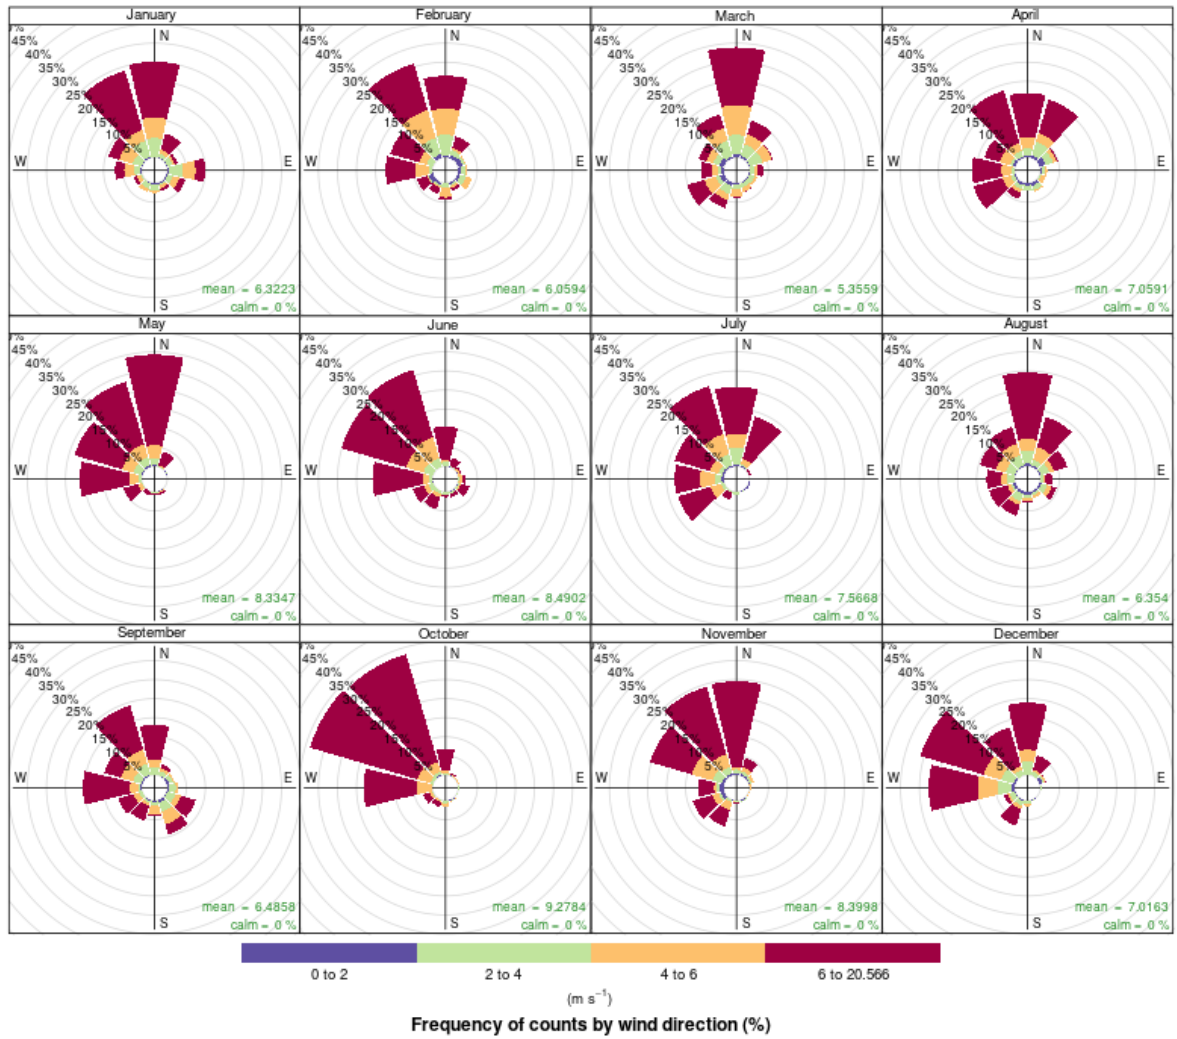

Figure S5. Wind rose TCCON Lauder location for 2015.

## 5 3.2 Wind directions at in-situ sites

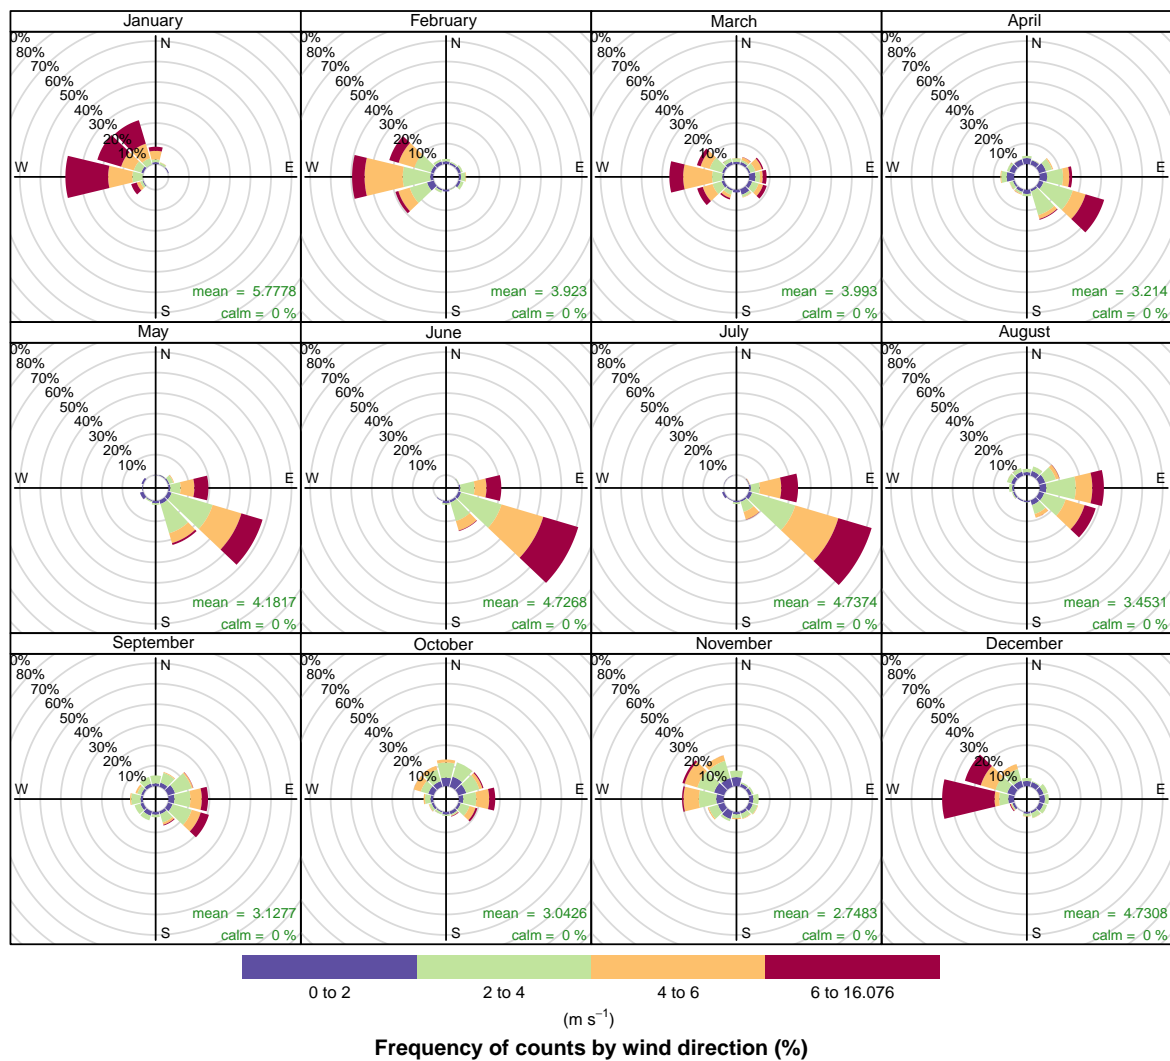

Figure S6. Wind rose at Gunn Point site, Australia 2015

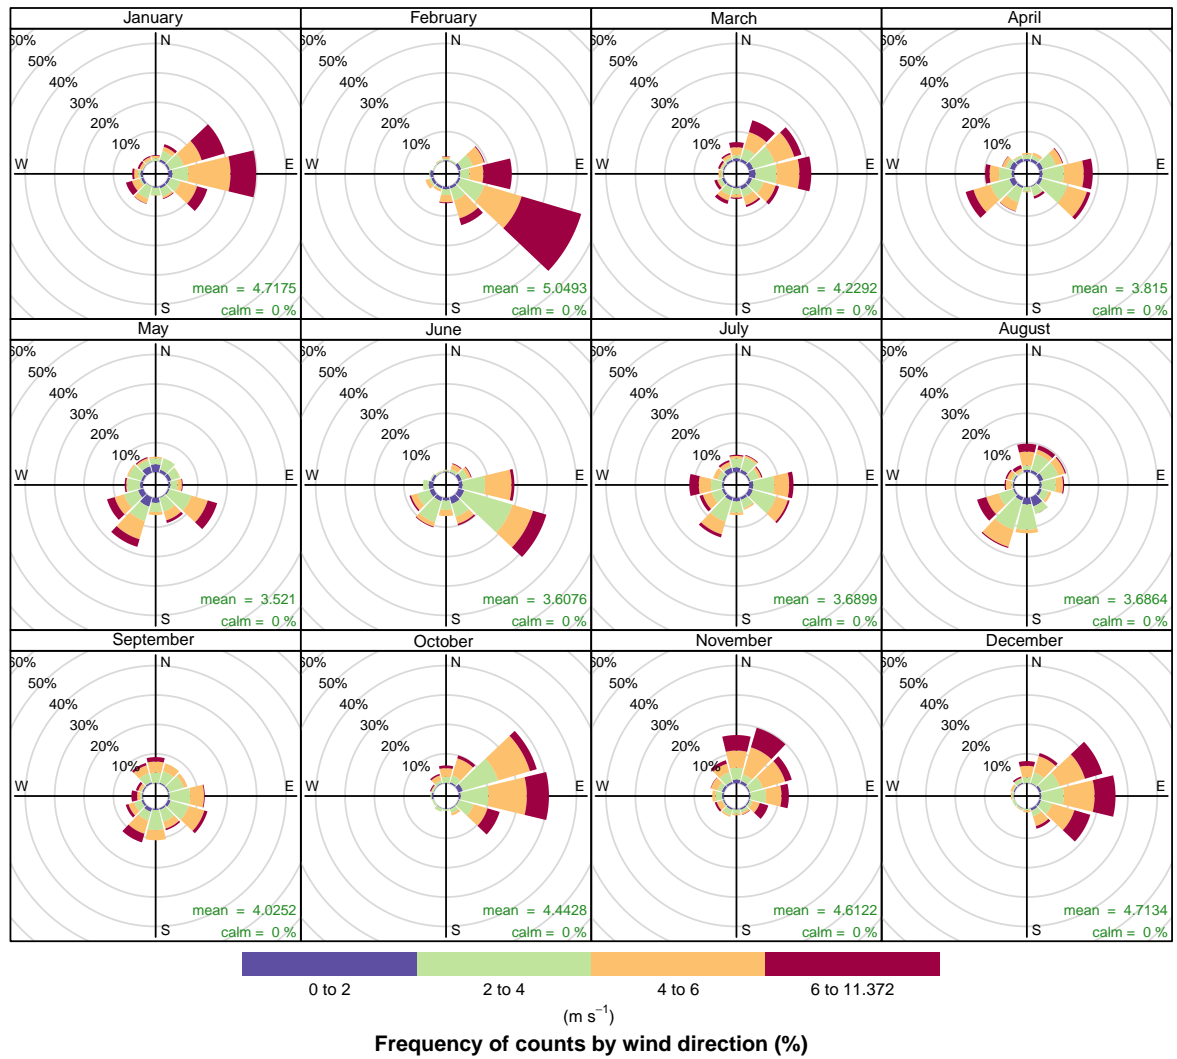

**Figure S7.** Wind rose at Ironbark site, Australia 2015

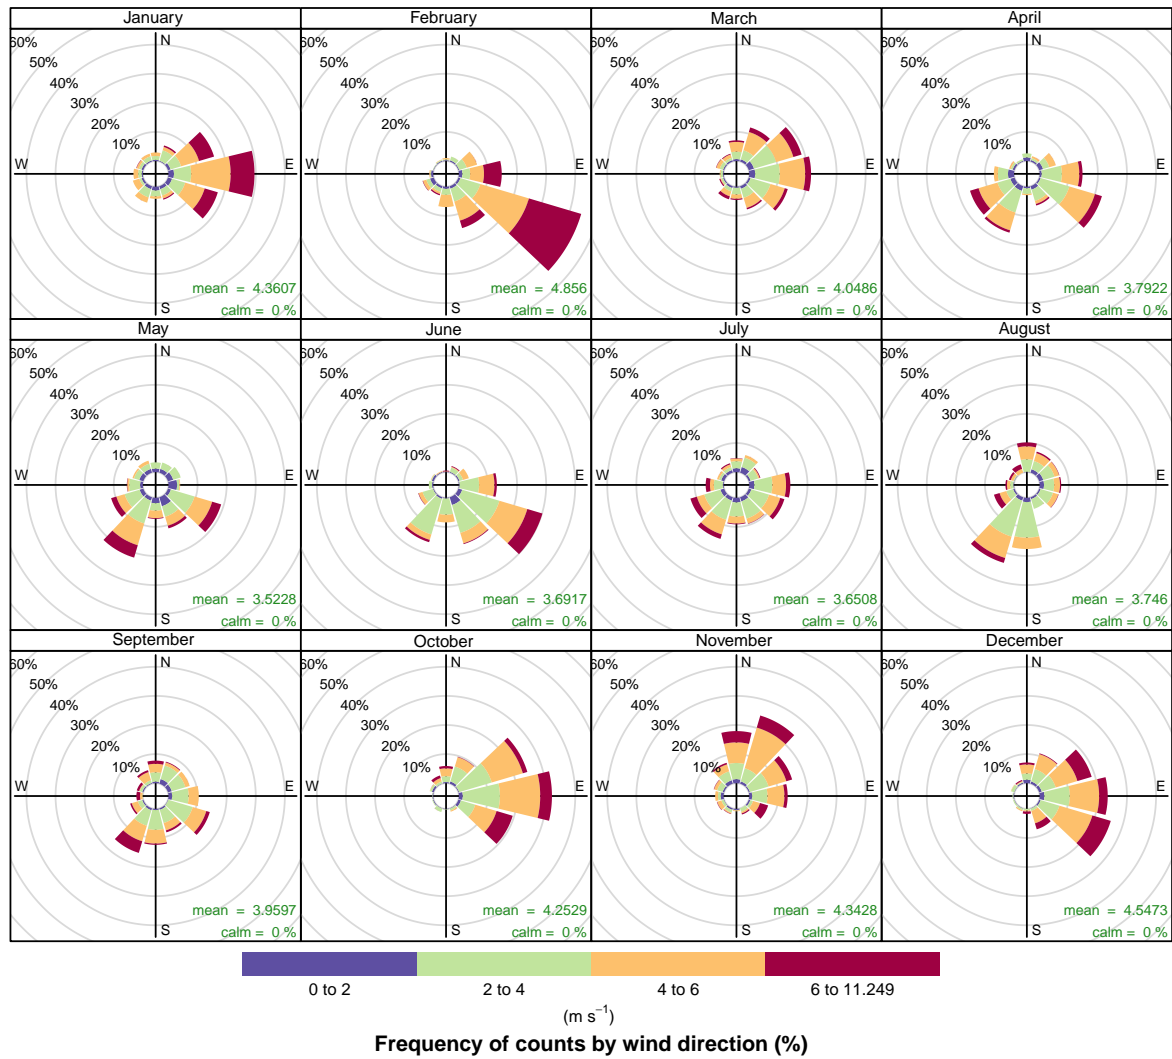

**Figure S8.** Wind rose at Burncluith site, Australia 2015



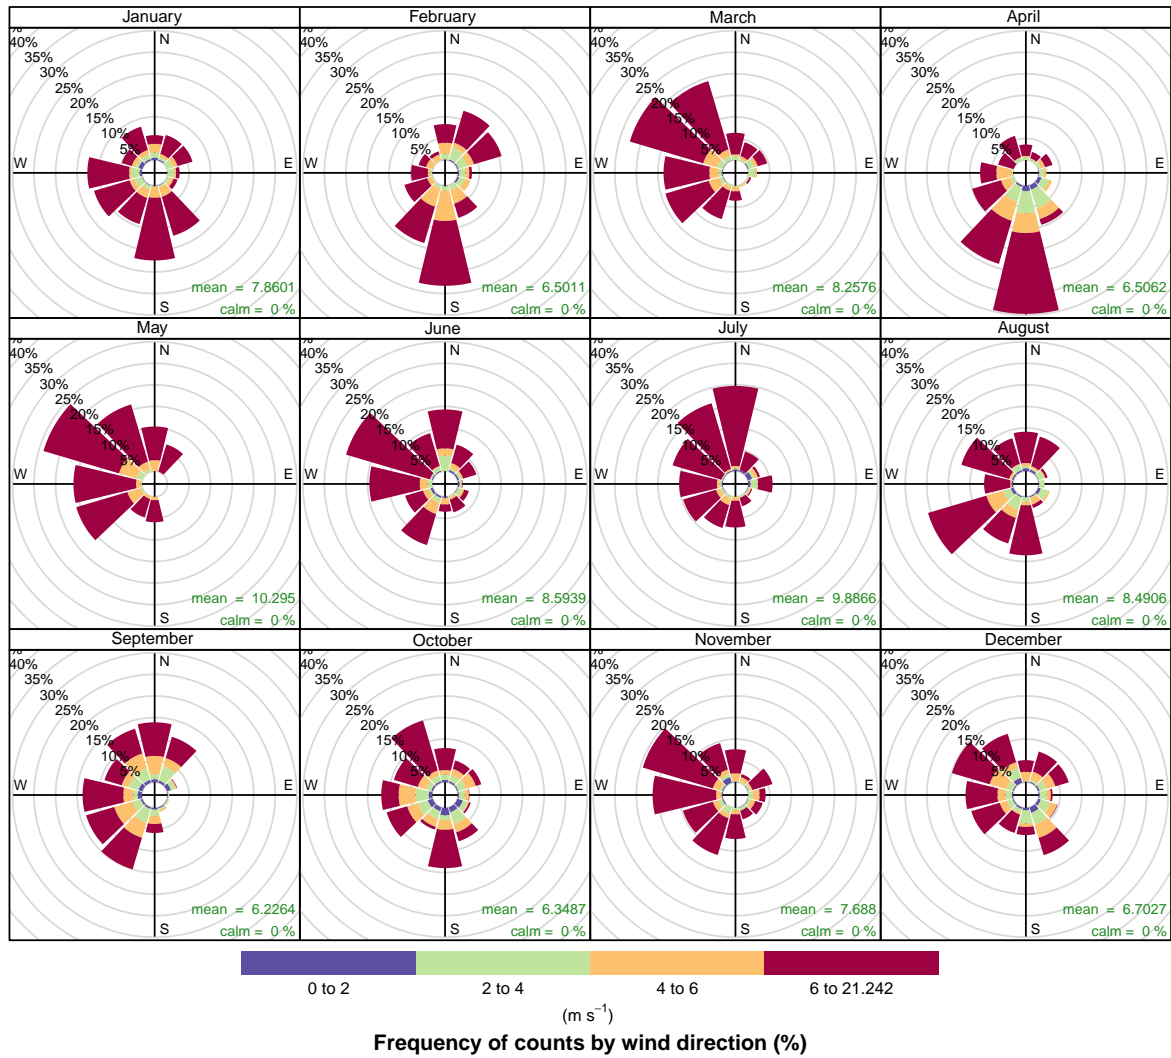

Figure S9. Wind rose at Cape Grim site, Australia 2015
